# Supplementary material for: Metabolic signature of the pathogenic 22q11.2 deletion identifies carriers and provides insight into systemic dysregulation
Source: bioRxiv or medRxiv preprint supplement (doi:10.1101/2023.01.13.23284505), 2023-01-14

Lys (V = 13829 , p-value = 1.66e-04 )

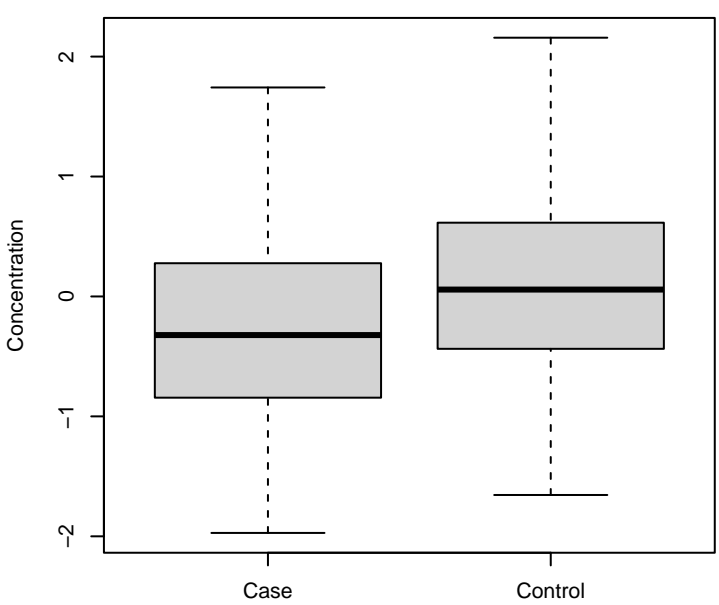

PC.O.36.5. (V = 13828 , p-value = 1.30e-05 )

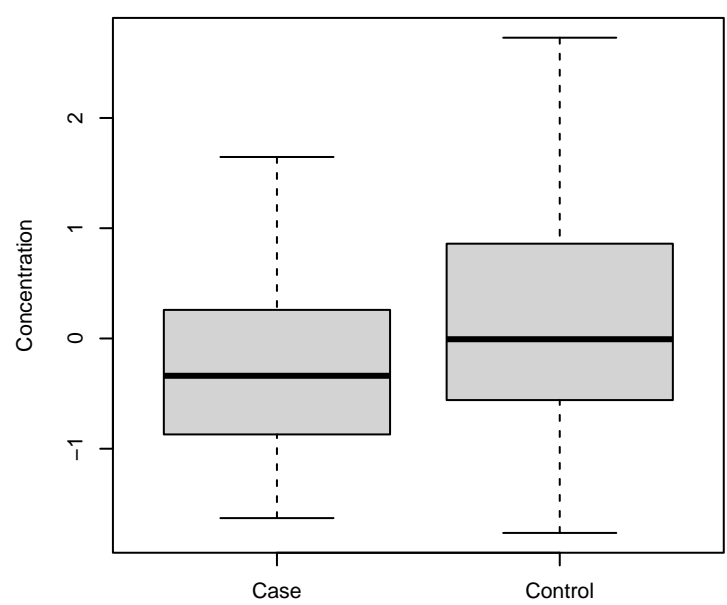

Trp (V = 13718 , p-value = 2.71e-04 )

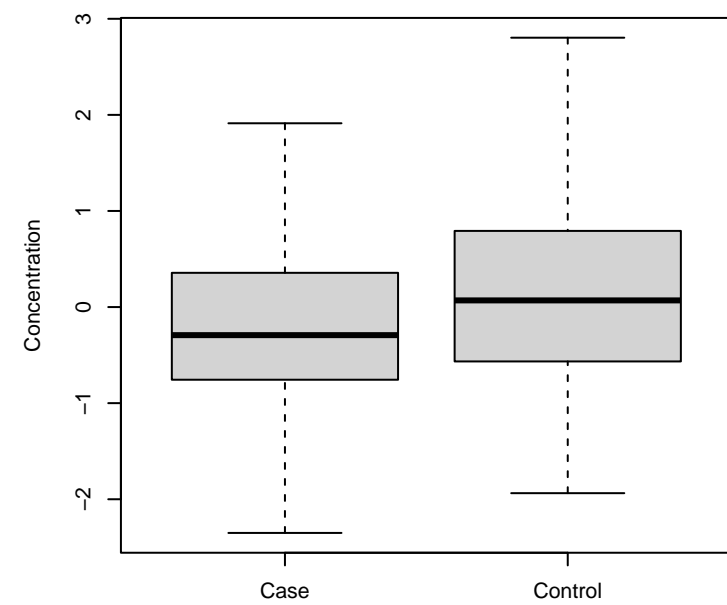

PC.O.36.3. (V = 13714 , p-value = 9.14e-05 )

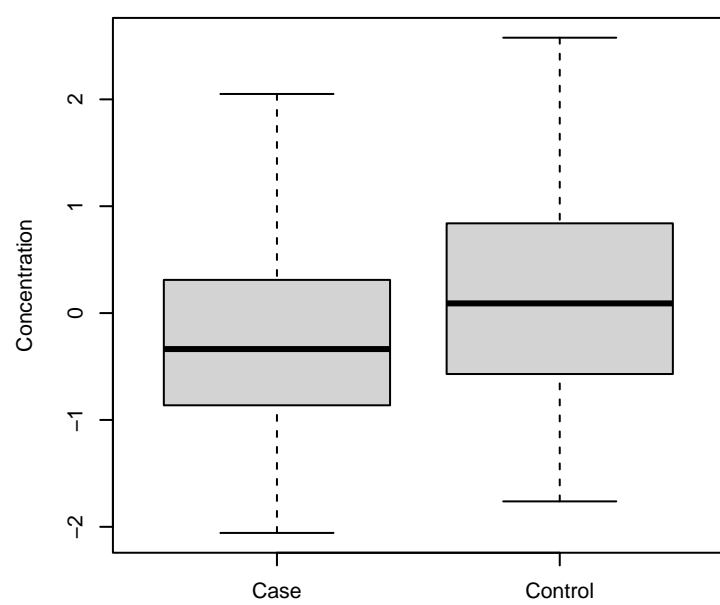

SM.38.3. (V = 13687 , p-value = 3.09e-04 )

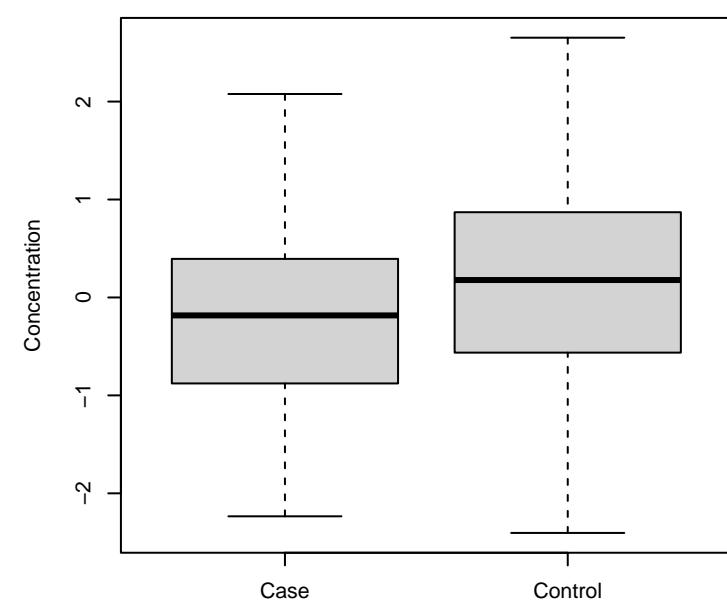

PC.36.4. (V = 13503 , p-value = 6.88e-04 )

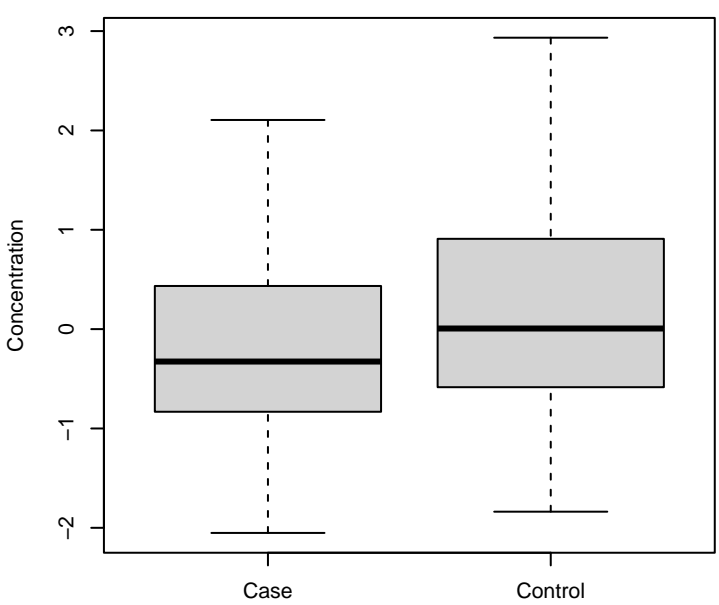

PC.36.2. (V = 13465 , p-value = 8.06e-04 )

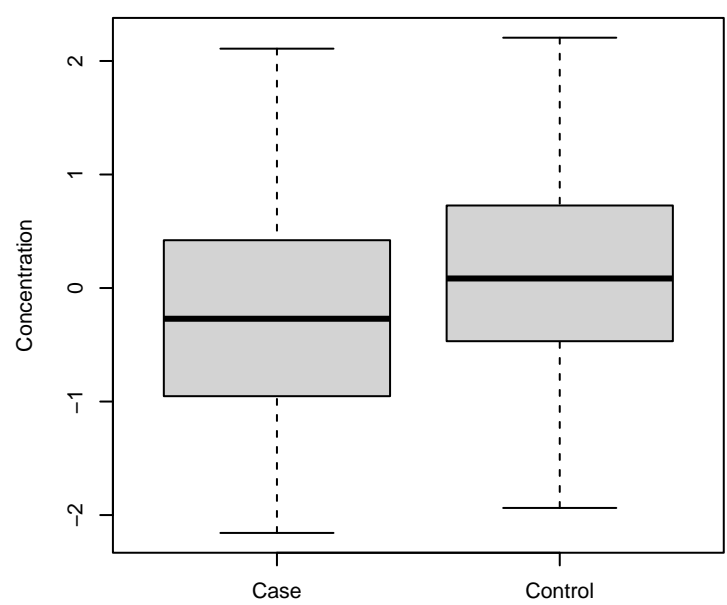

Gly (V = 13361 , p-value = 1.22e-03 )

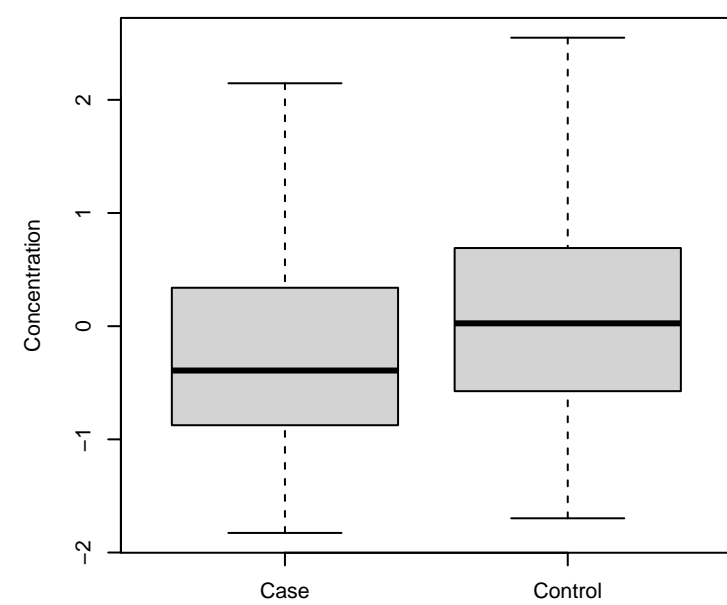

SM.32.1. (V = 13330 , p-value = 1.35e-03 )

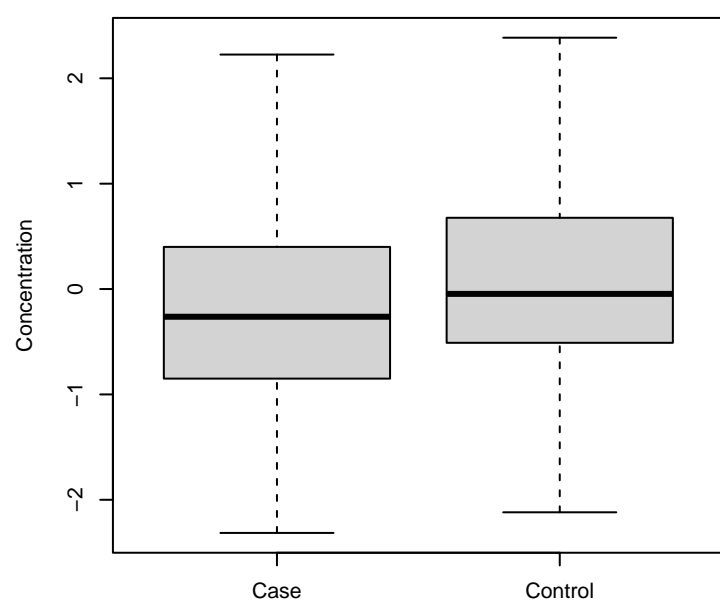

SM.44.1. (V = 13226 , p-value = 2.06e-03 )

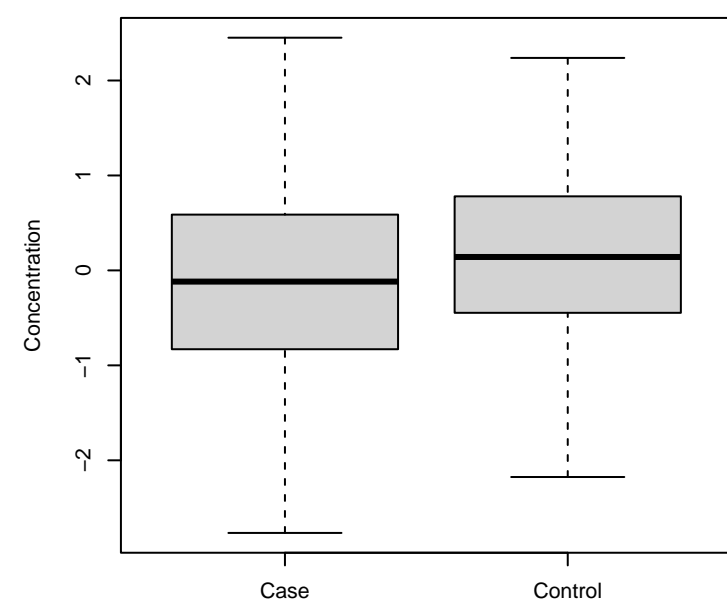

SM.42.2. (V = 13164 , p-value = 2.55e-03 )

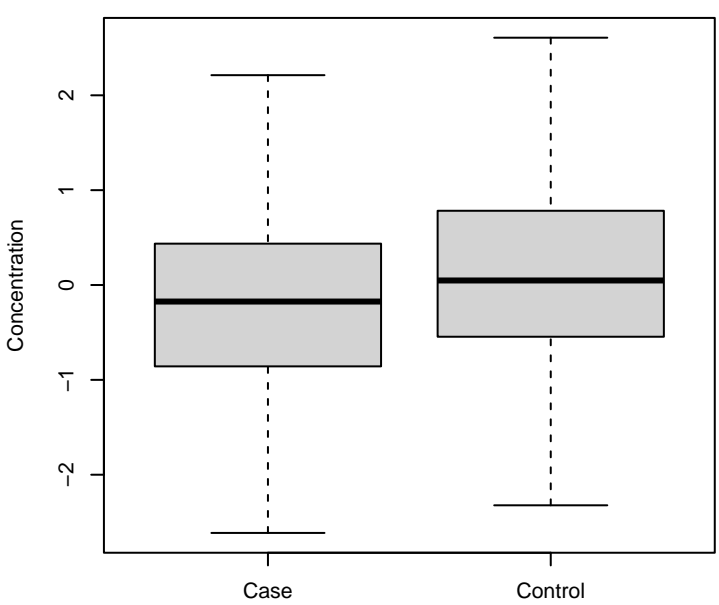

Ala (V = 13096 , p-value = 2.09e-03 )

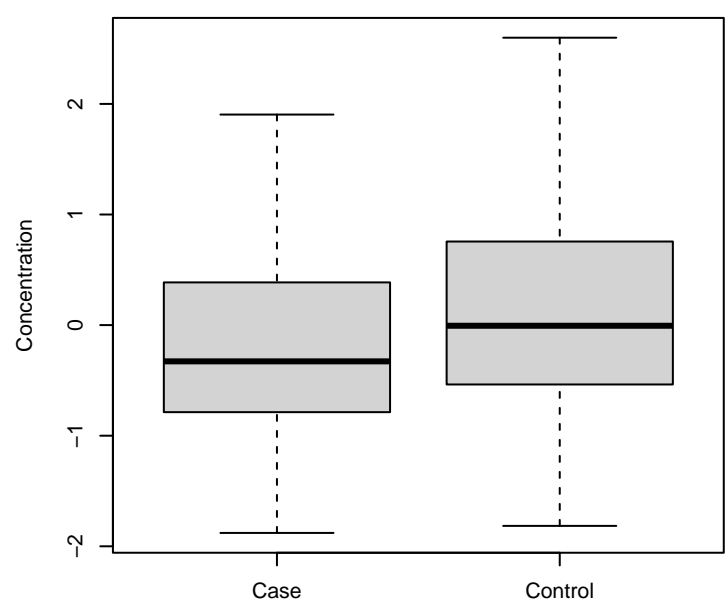

SM.41.2. (V = 13031 , p-value = 4.32e-03 )

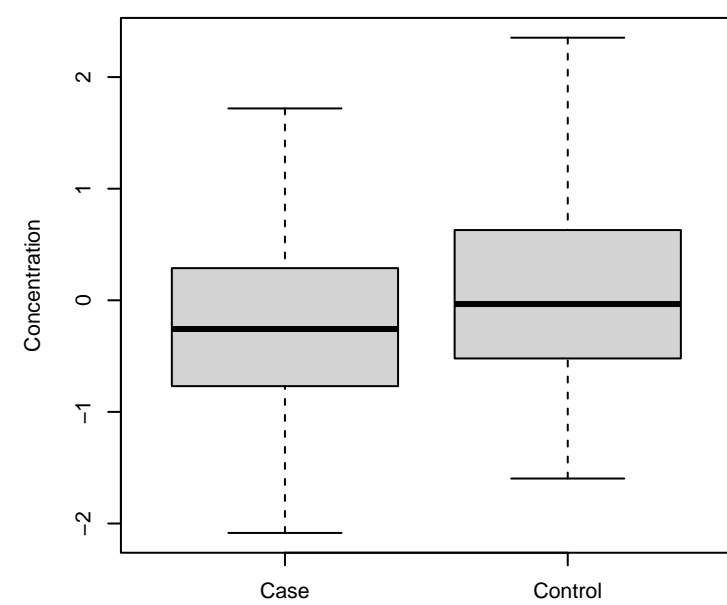

t4.OH.Pro (V = 13008 , p-value = 3.98e-04 )

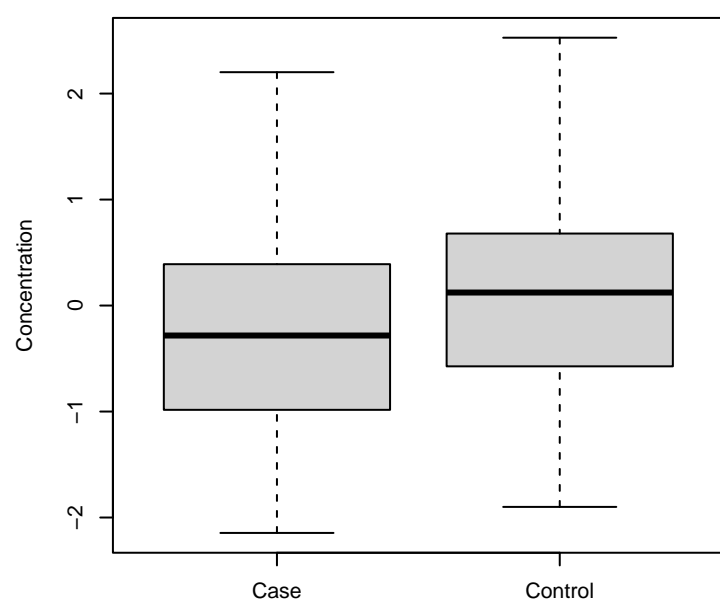

SM.39.1. (V = 12978 , p-value = 5.27e-03 )

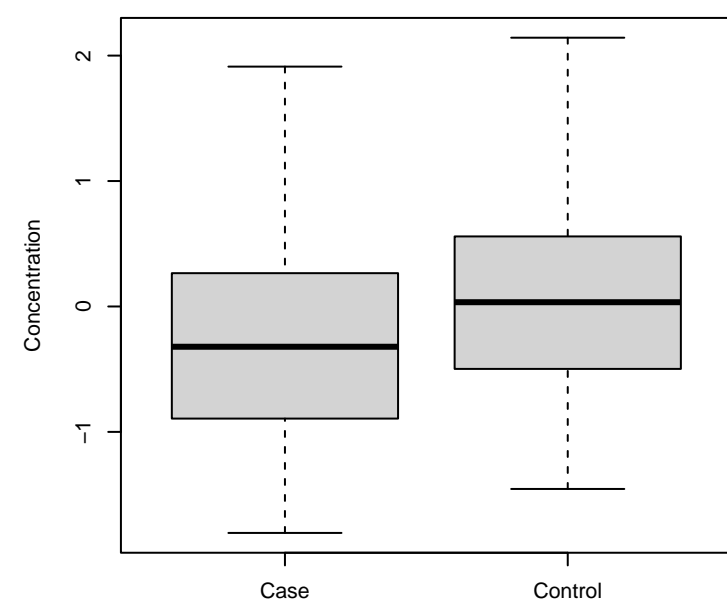

SM.42.1. (V = 12941 , p-value = 6.02e-03 )

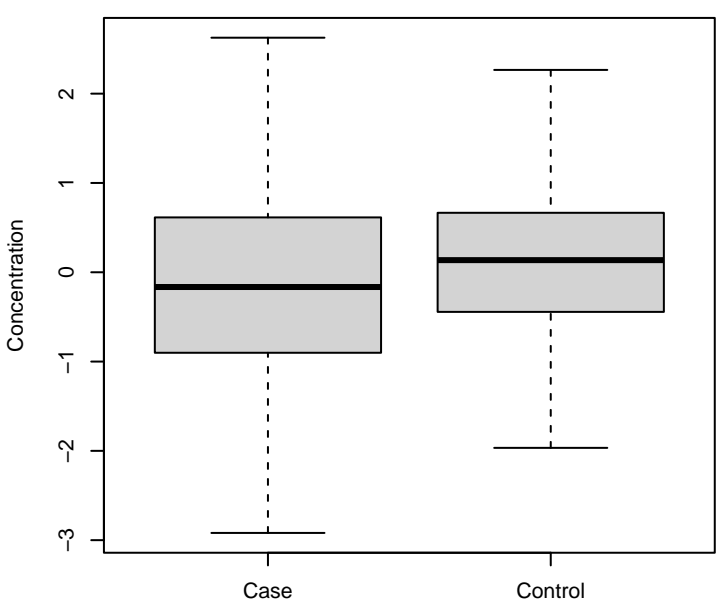

PC.33.0. (V = 12904 , p-value = 6.69e-03 )

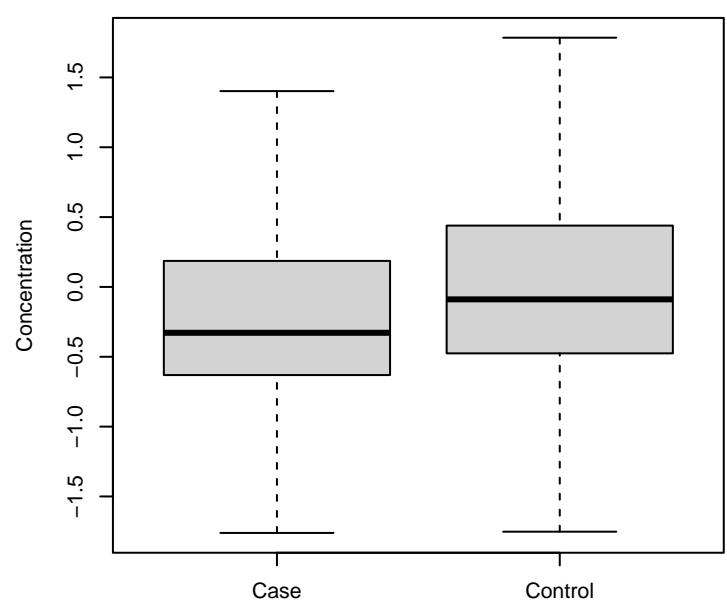

SM.40.1. (V = 12902 , p-value = 6.69e-03 )

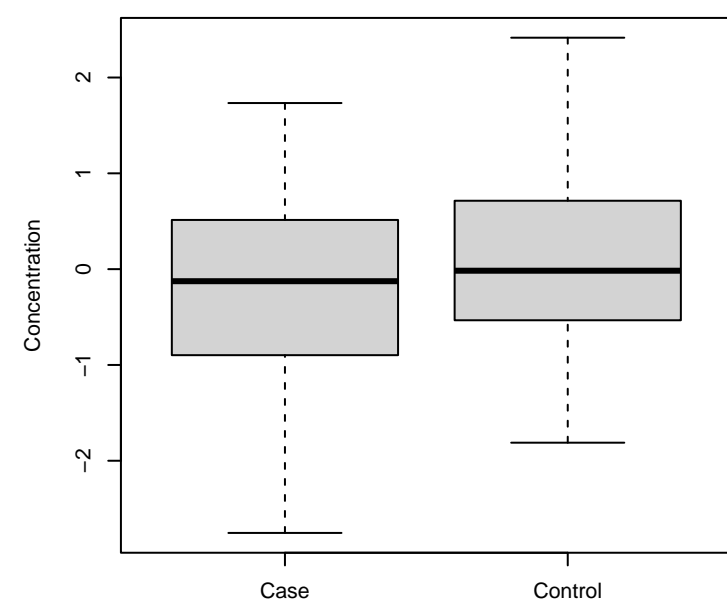

PC.30.0. (V = 12807 , p-value = 8.98e-03 )

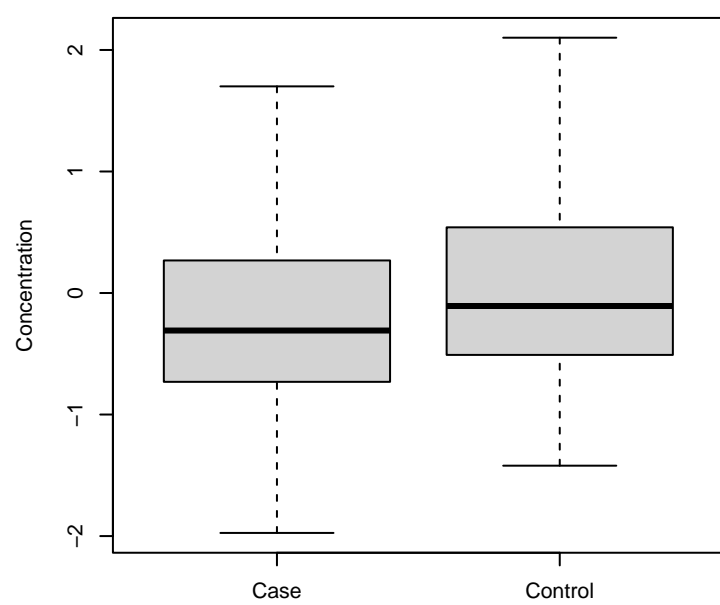

PC.40.6. (V = 12799 , p-value = 3.37e-06 )

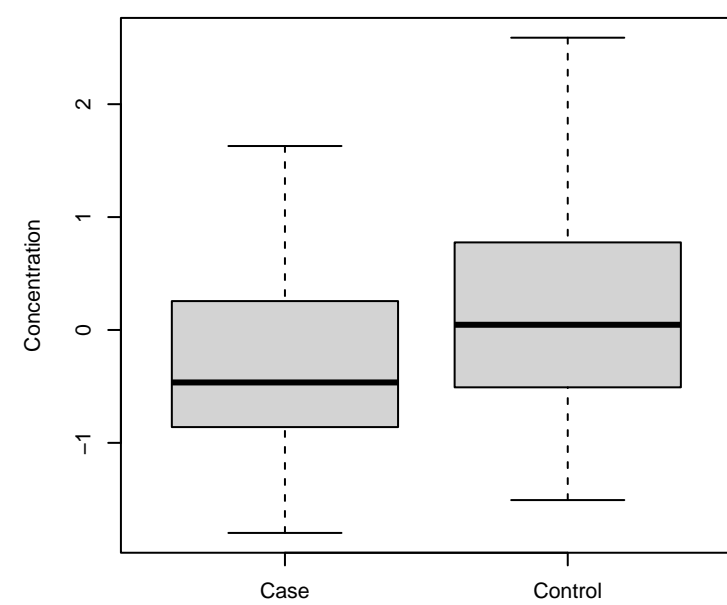

PC.36.1. (V = 12790 , p-value = 9.27e-03 )

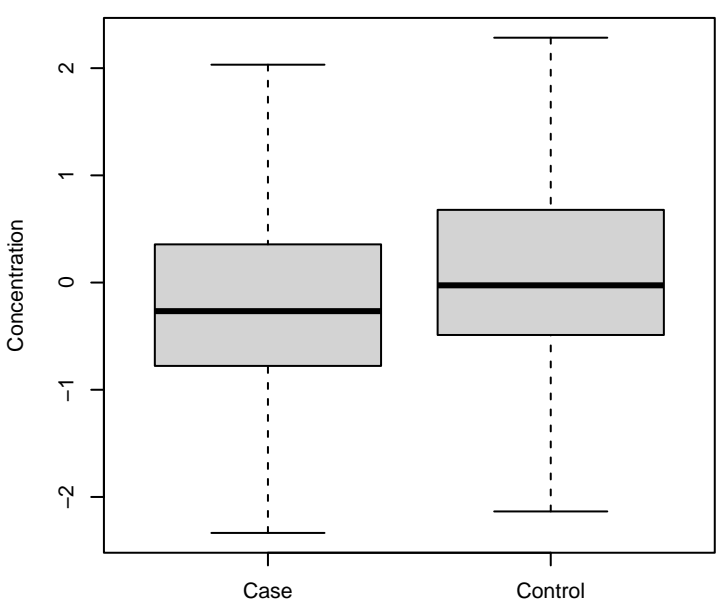

PC.O.34.2. (V = 12772 , p-value = 9.78e-03 )

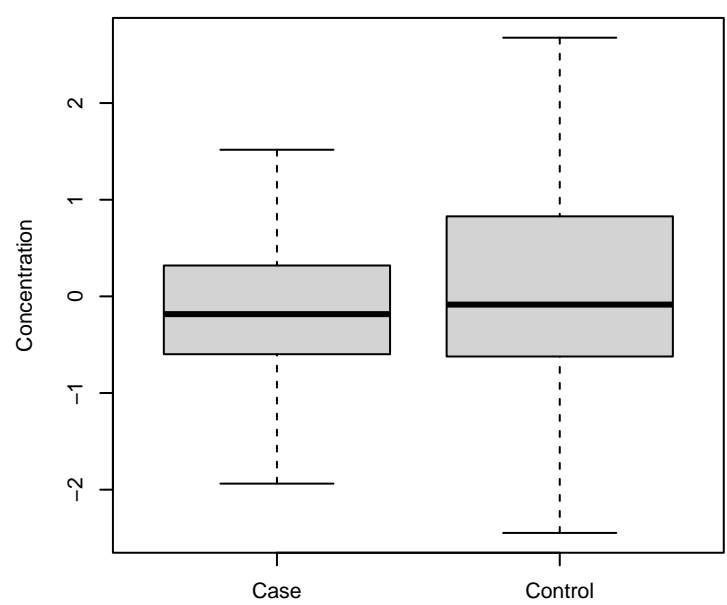

PC.33.2. (V = 12758 , p-value = 7.35e-05 )

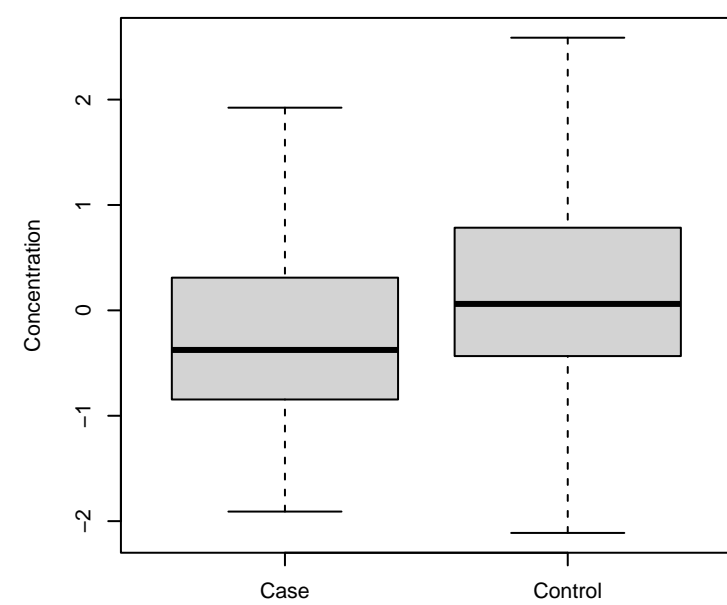

Thr (V = 12751 , p-value = 7.31e-03 )

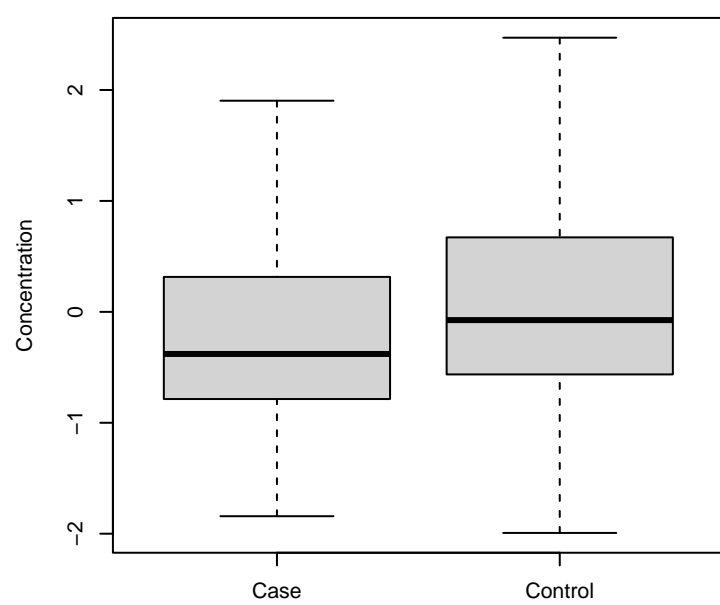

SM.33.2. (V = 12669 , p-value = 1.68e-06 )

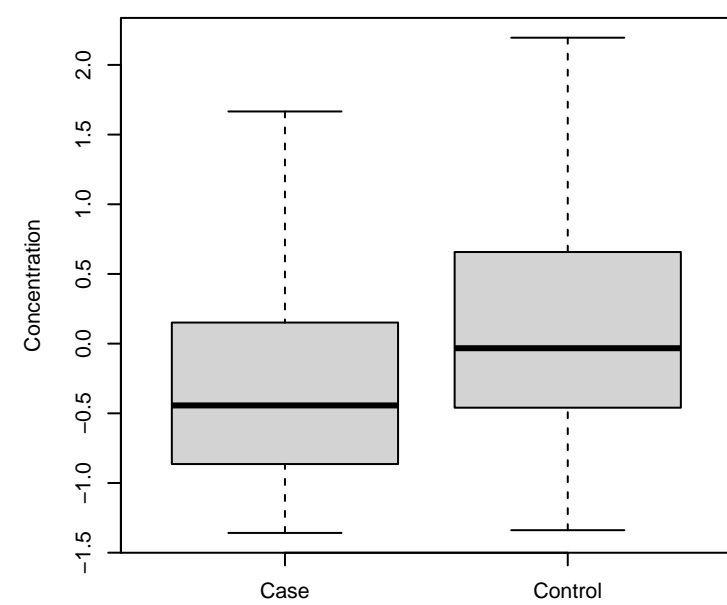

**Met.SO (V = 12618 , p-value = 1.59e-02)**

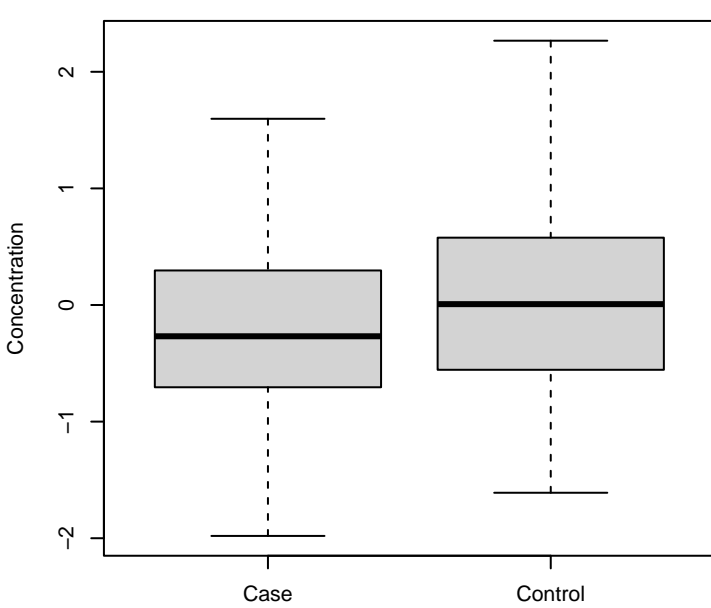

**LPC.18.2. (V = 12587 , p-value = 9.14e-05)**

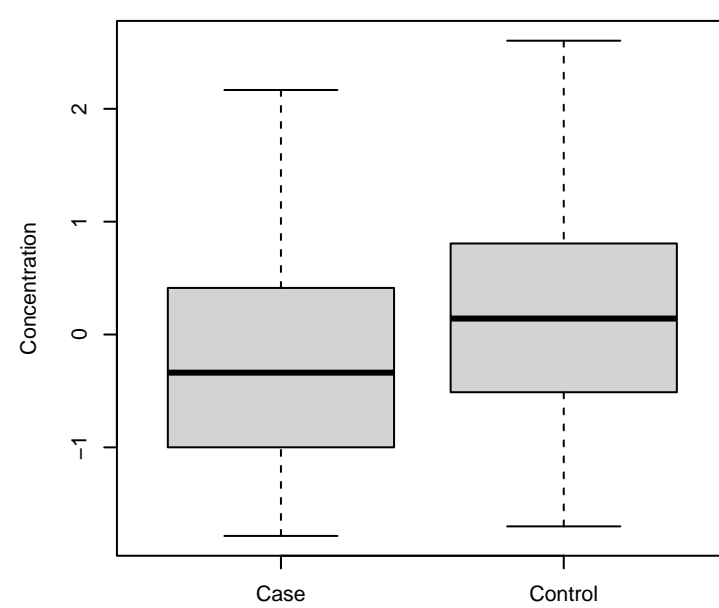

**SM.43.1. (V = 12581 , p-value = 1.77e-02)**

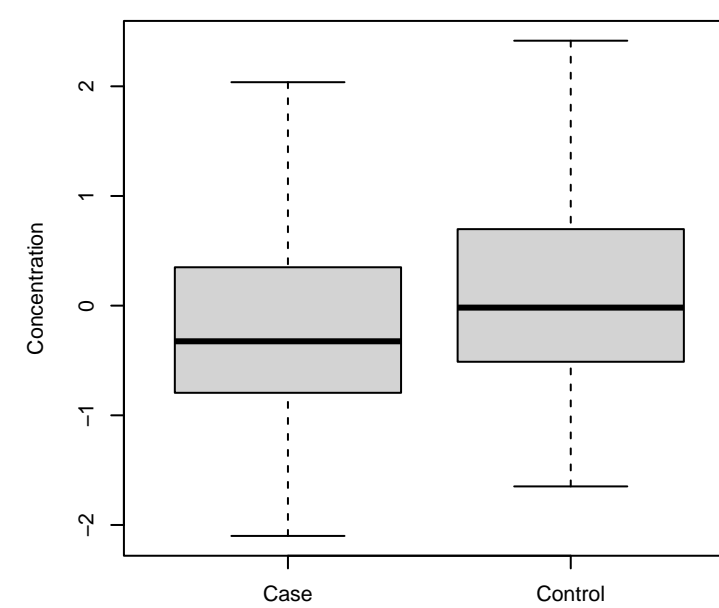

**PC.38.2. (V = 12570 , p-value = 9.20e-04)**

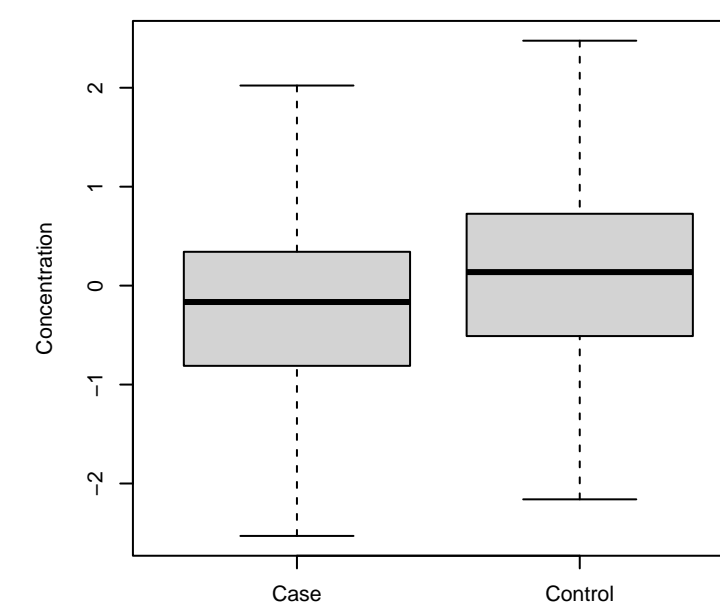

**SM.37.1. (V = 12555 , p-value = 1.91e-02)**

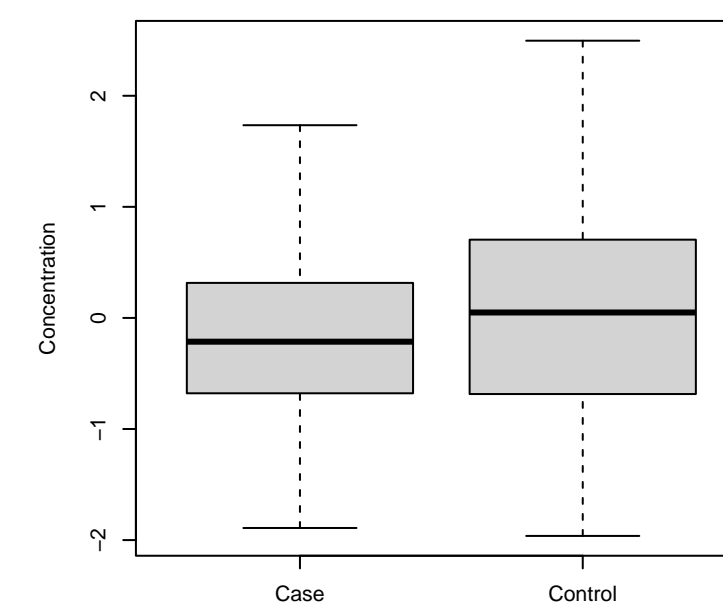

**LPC.20.4. (V = 12535 , p-value = 2.02e-02)**

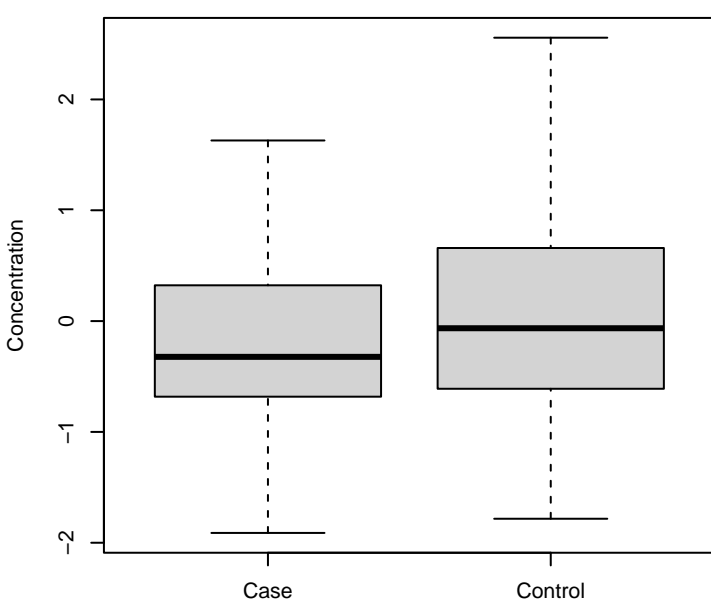

**PC.33.4. (V = 12425 , p-value = 1.40e-02)**

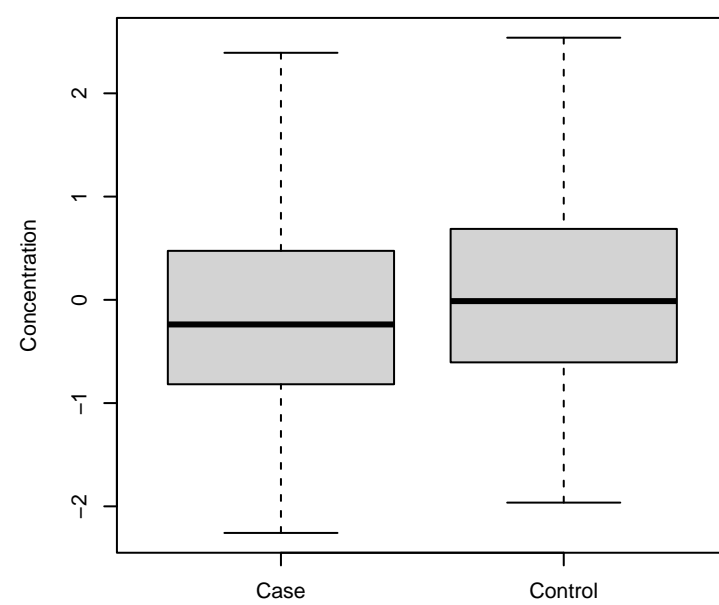

**PC.41.5. (V = 12134 , p-value = 3.40e-02)**

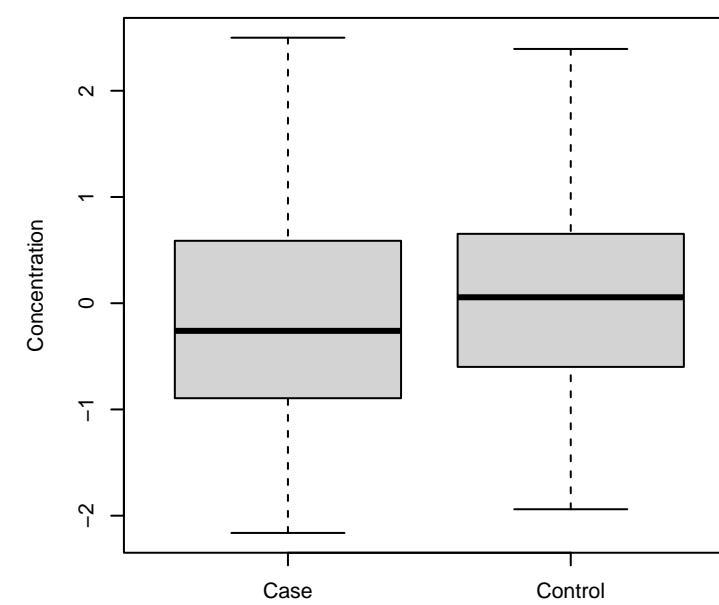

**SM.43.2. (V = 12127 , p-value = 1.34e-03)**

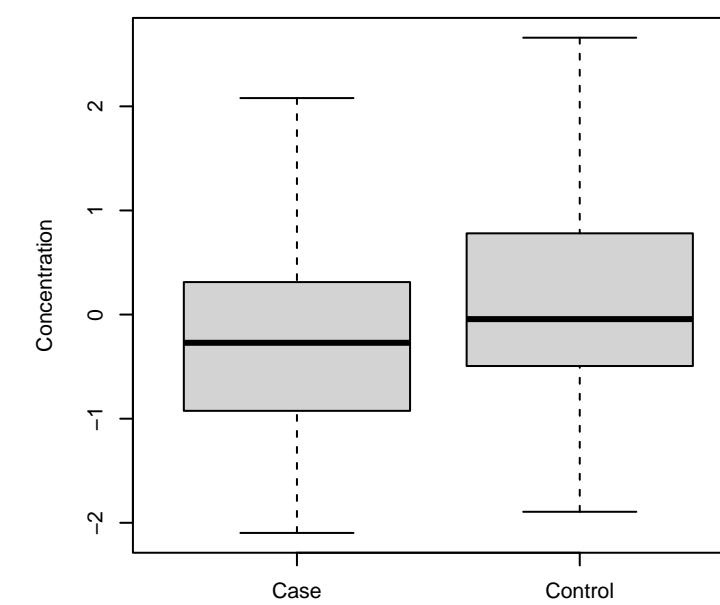

**Glu (V = 12048 , p-value = 7.26e-03)**

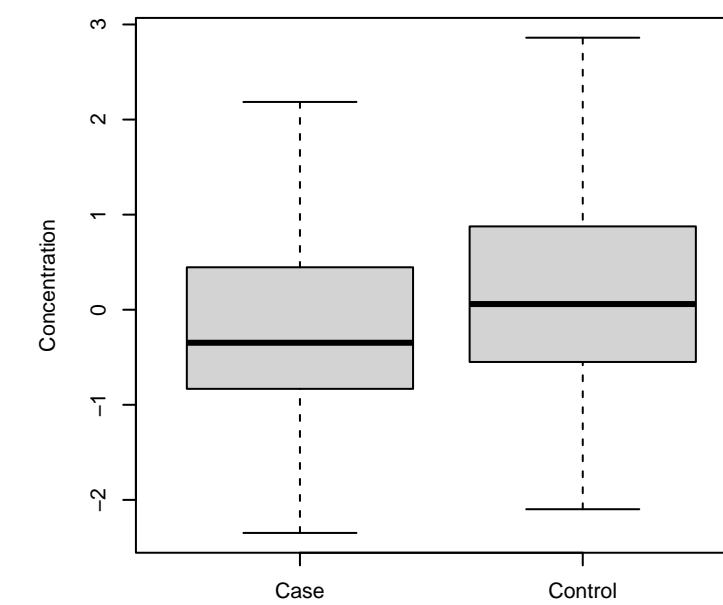

**Asp (V = 11946 , p-value = 1.75e-03)**

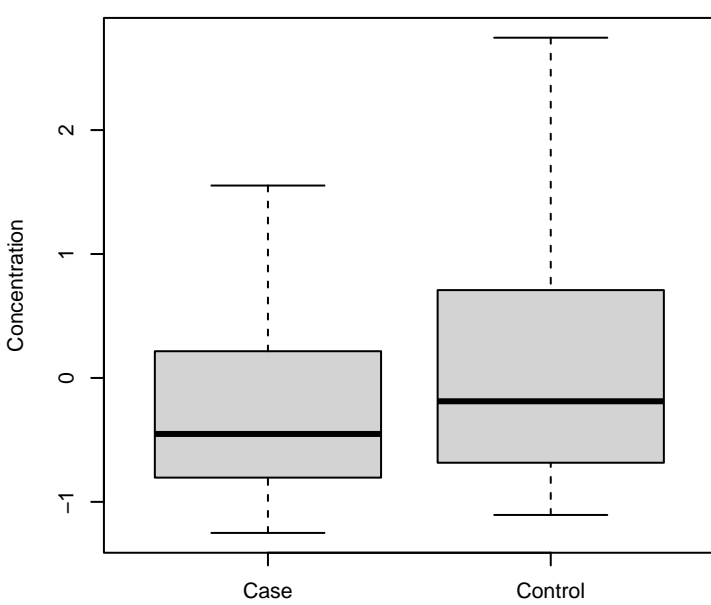

**Kynurenine (V = 11499 , p-value = 9.53e-05)**

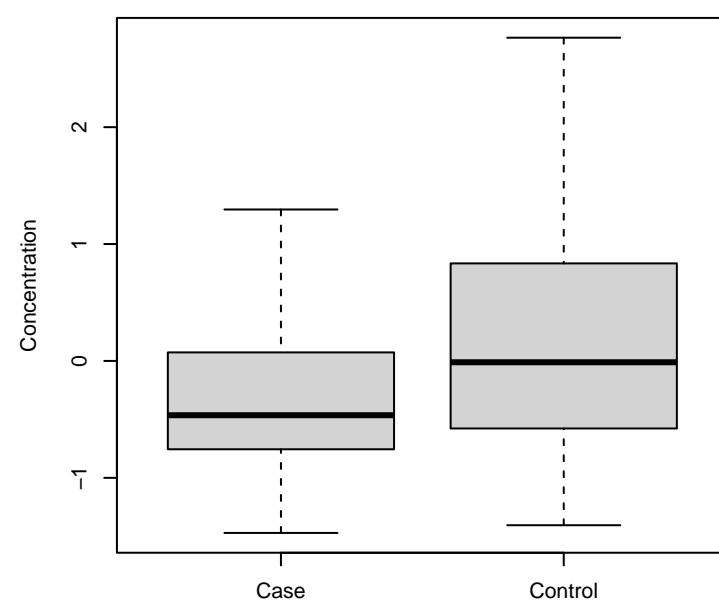

**PC.O.34.0. (V = 8458 , p-value = 4.90e-02)**

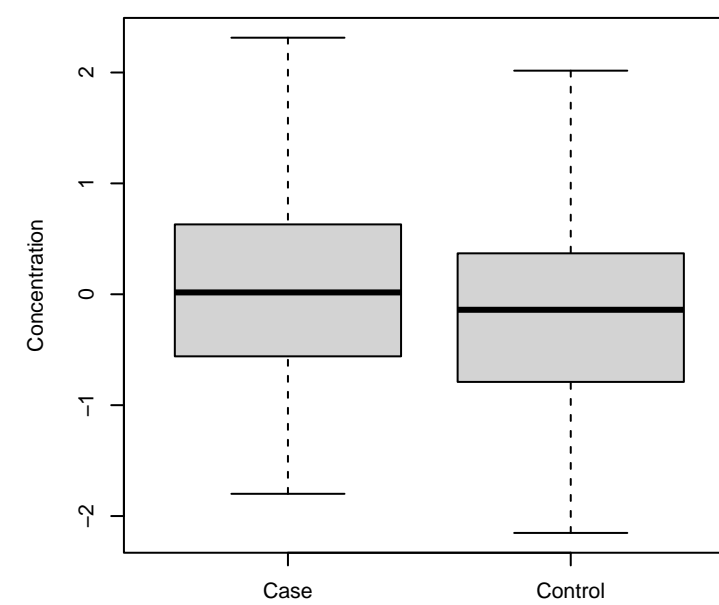

**Ser (V = 8412 , p-value = 2.43e-04)**

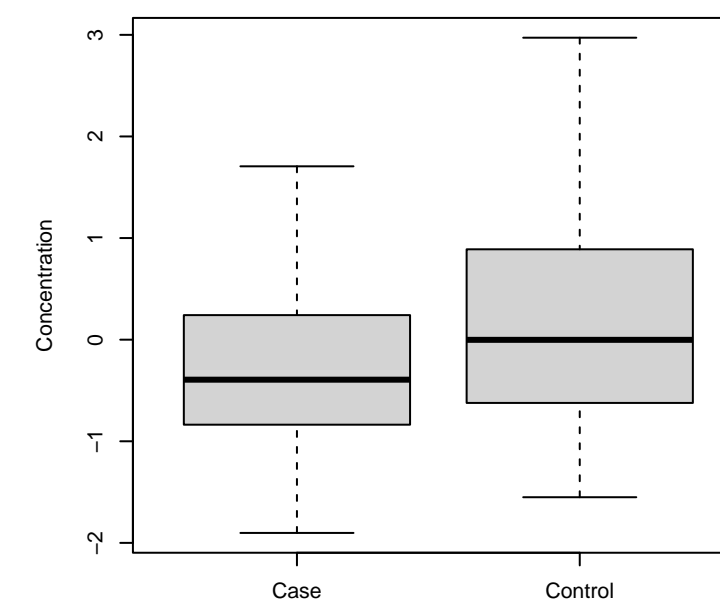

**Cer.42.1. (V = 8330 , p-value = 3.33e-02)**

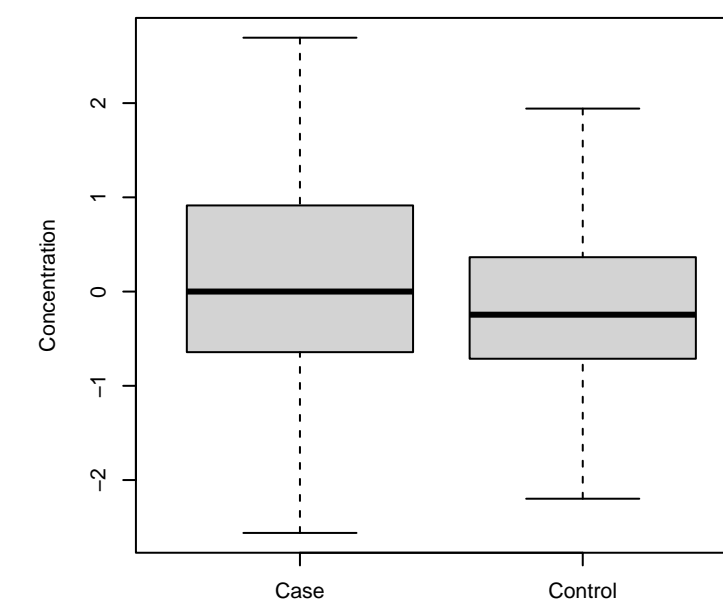

**AC.18.0. (V = 8086 , p-value = 1.59e-02)**

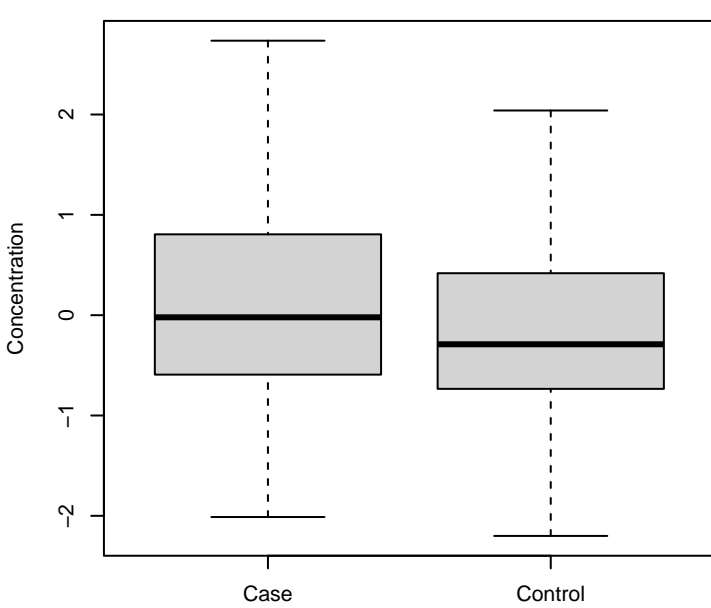

**PC.O.34.1. (V = 7953 , p-value = 1.02e-02)**

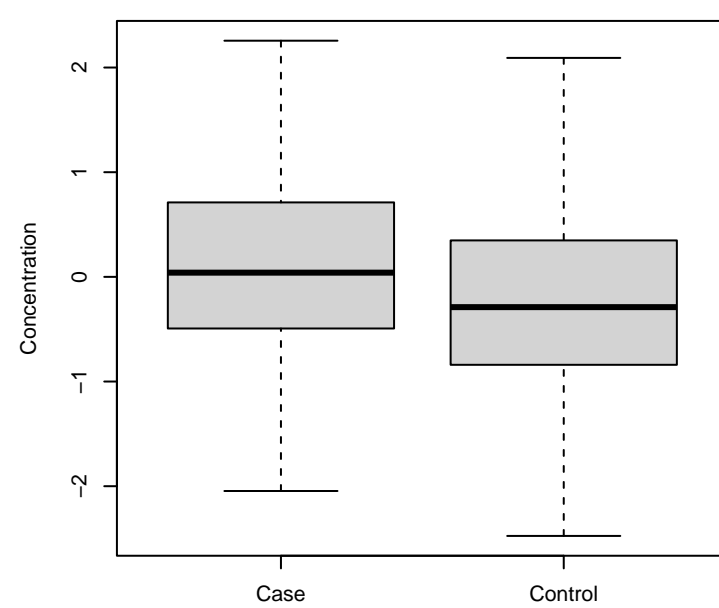

**AC.16.0. (V = 7951 , p-value = 1.02e-02)**

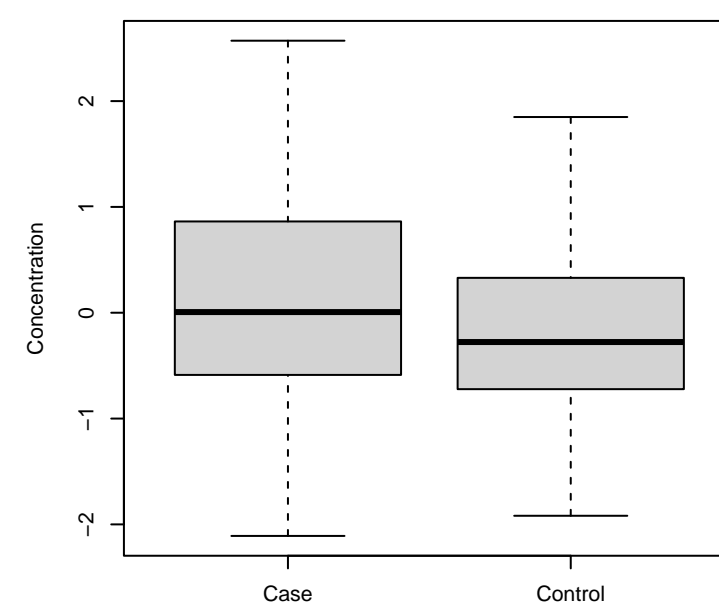

**PC.32.1. (V = 7900 , p-value = 8.98e-03)**

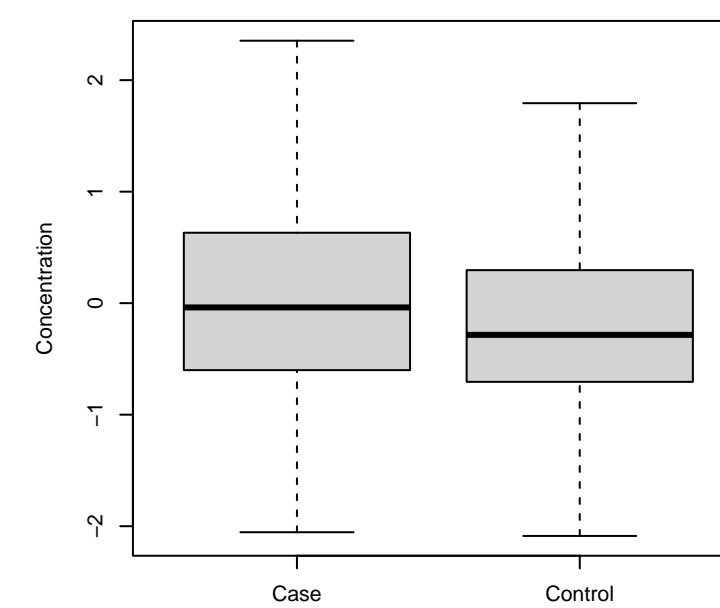

**Cer.42.2. (V = 7577 , p-value = 2.91e-03)**

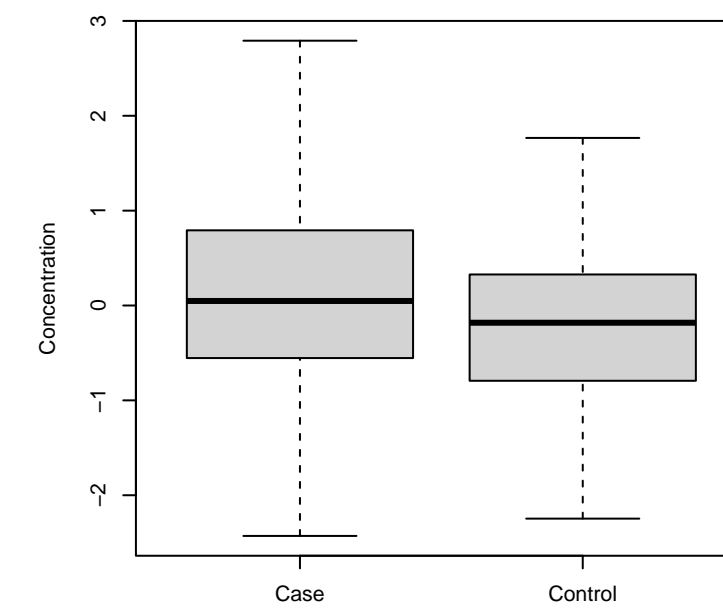

**Pro (V = 7348 , p-value = 2.25e-03)**

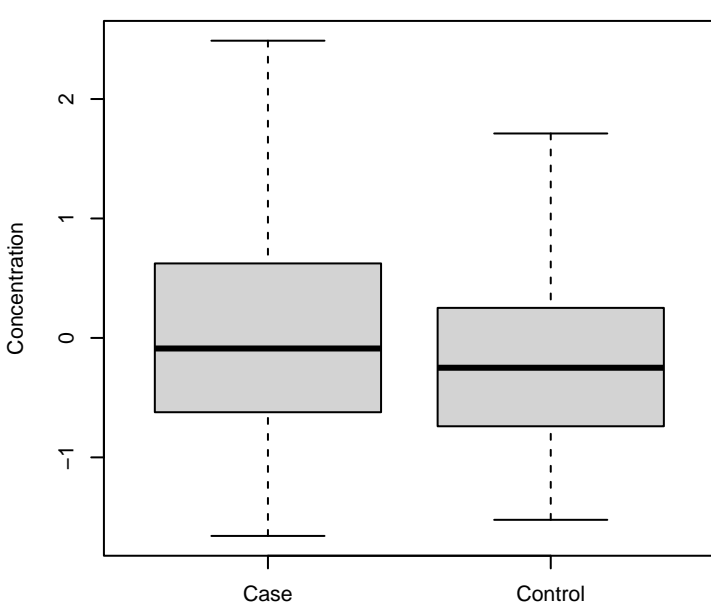

**LPC.16.0. (V = 7256 , p-value = 8.45e-04)**

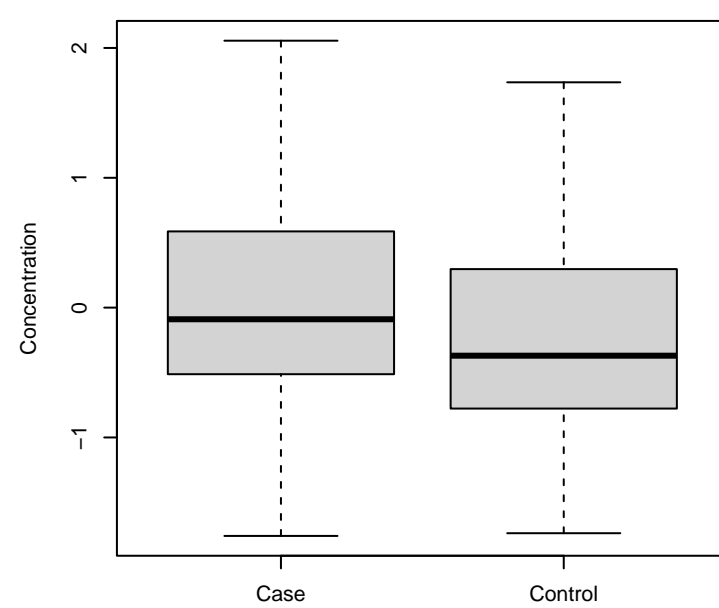

**Cer.40.1. (V = 7176 , p-value = 6.19e-04)**

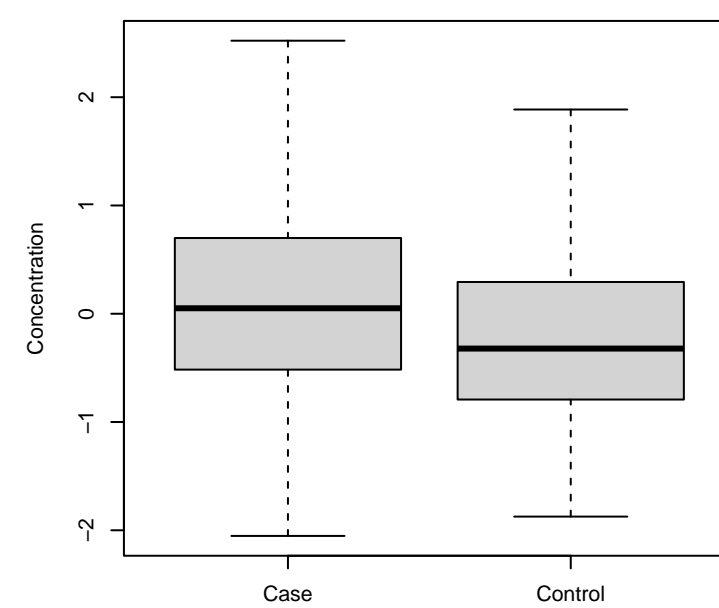

**PC.O.36.2. (V = 6961 , p-value = 2.43e-04)**

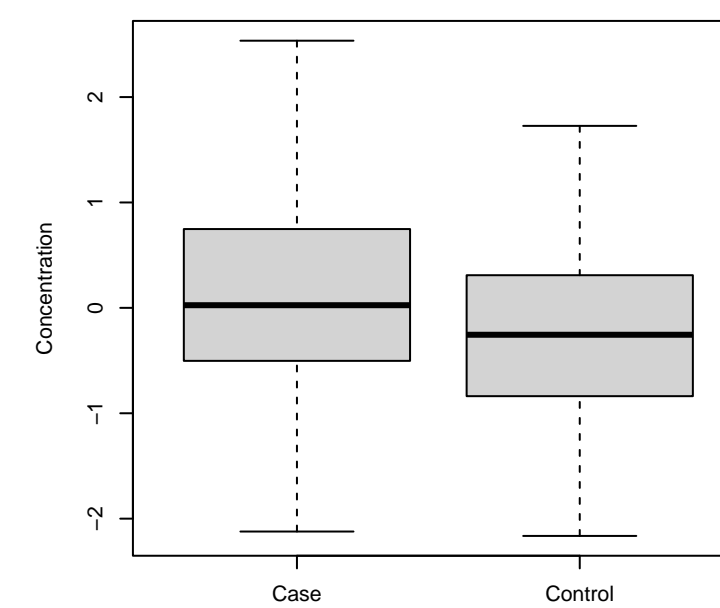

**Spermine (V = 6398 , p-value = 3.25e-05)**

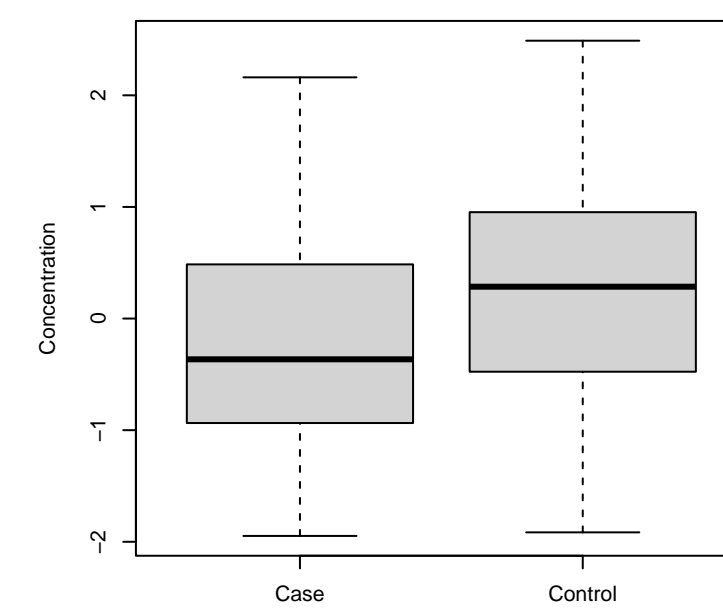

CE.20.4. (V = 6256 , p-value = 5.01e-04 )

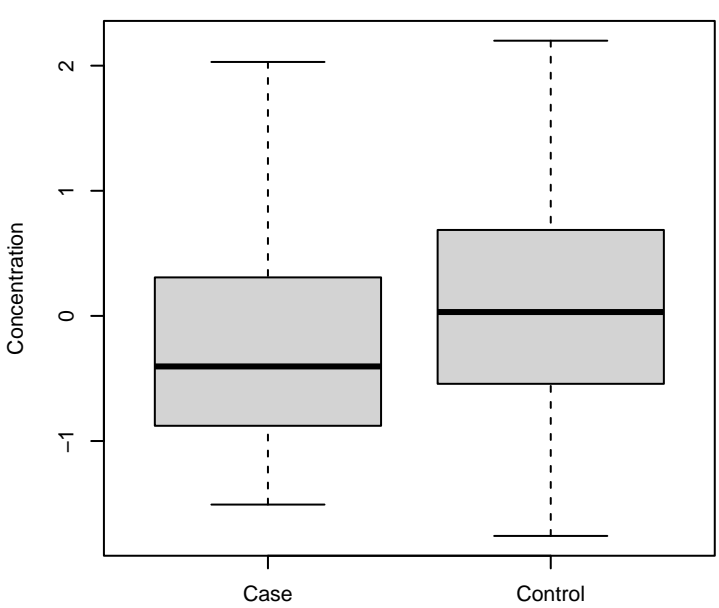

Creatinine (V = 5435 , p-value = 6.94e-08 )

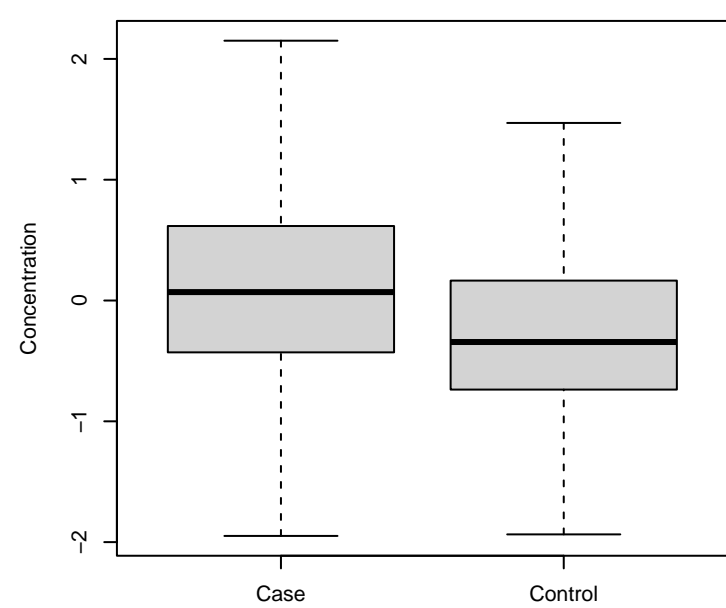

Met (V = 5097 , p-value = 1.73e-02 )

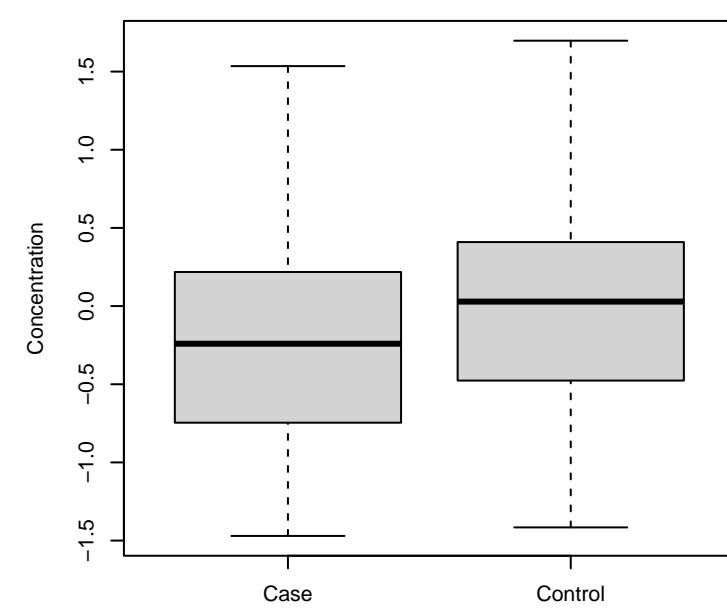

ADMA (V = 4438 , p-value = 6.14e-03 )

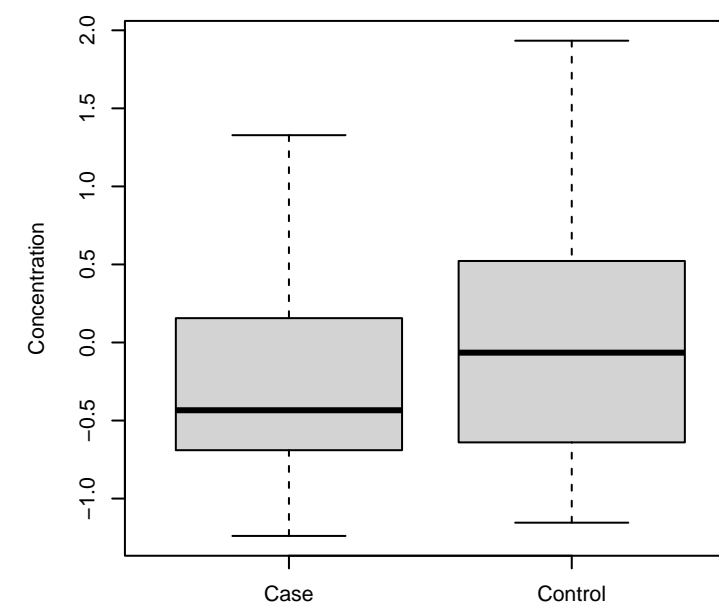

PC.O.35.3. (V = 2278 , p-value = 3.25e-02 )

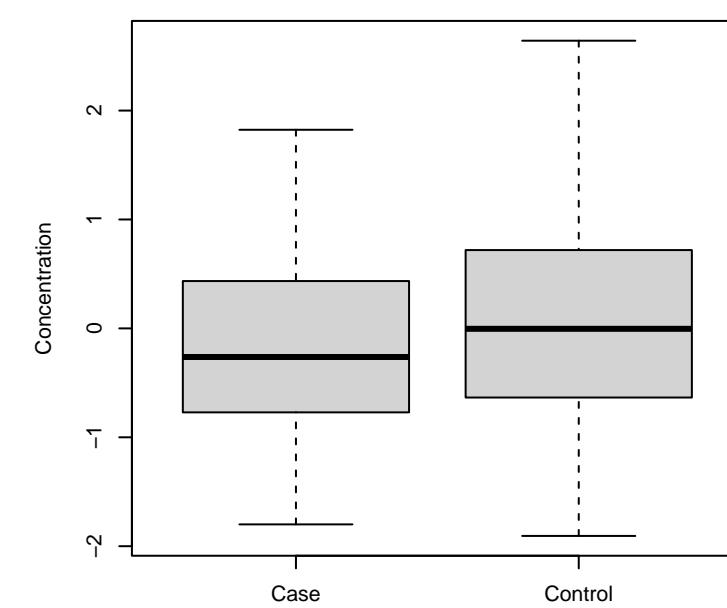

PC.40.9. (V = 2177 , p-value = 9.18e-03 )

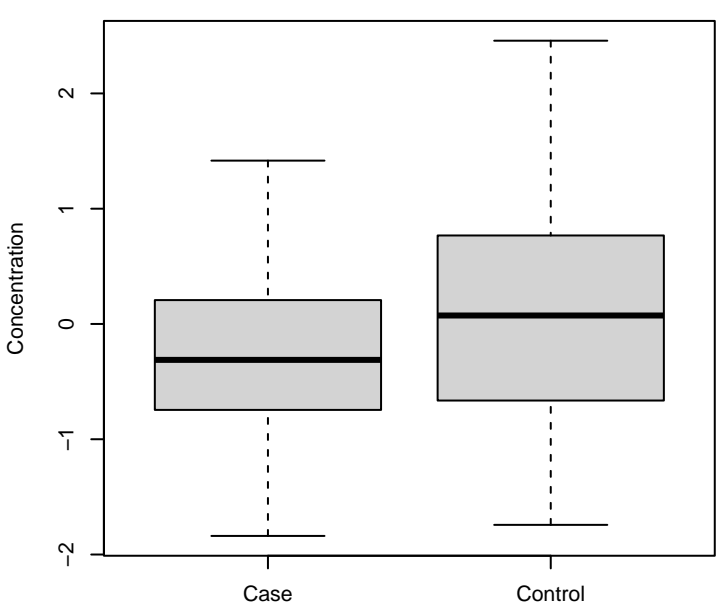

DG.42.1. (V = 2059 , p-value = 1.12e-02 )

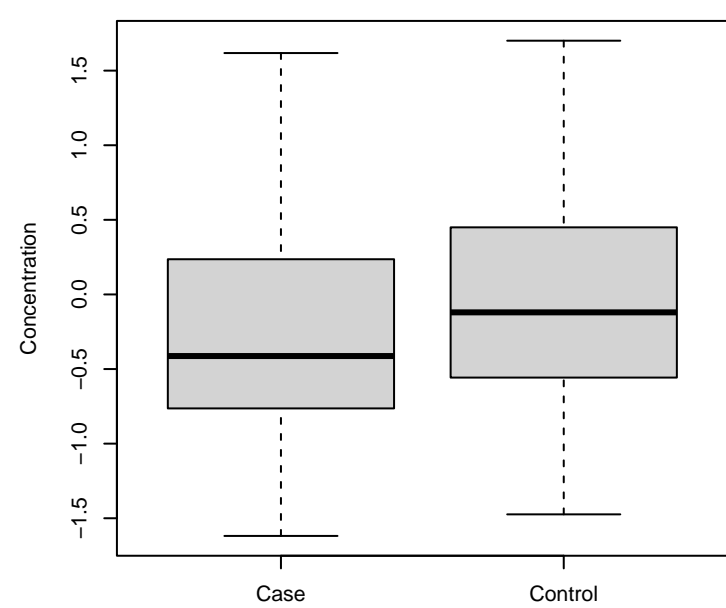

DG.42.2. (V = 682 , p-value = 8.98e-03 )

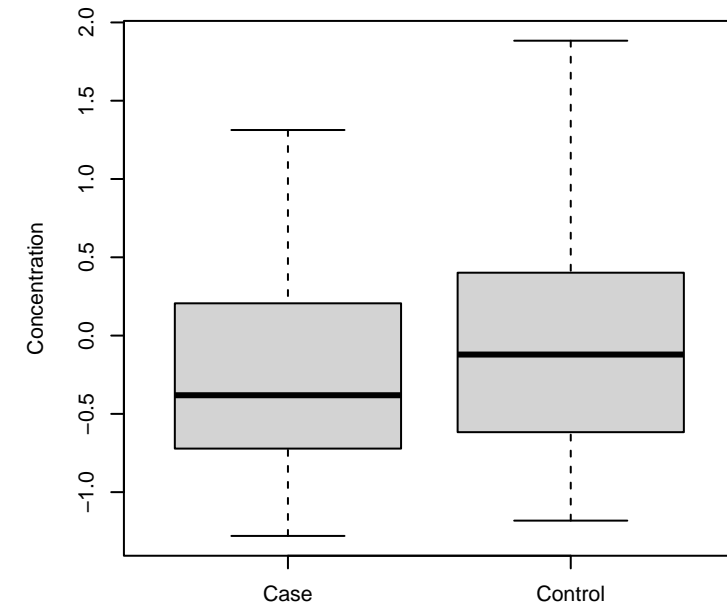

PC.O.38.6. (V = 43 , p-value = 2.53e-02 )

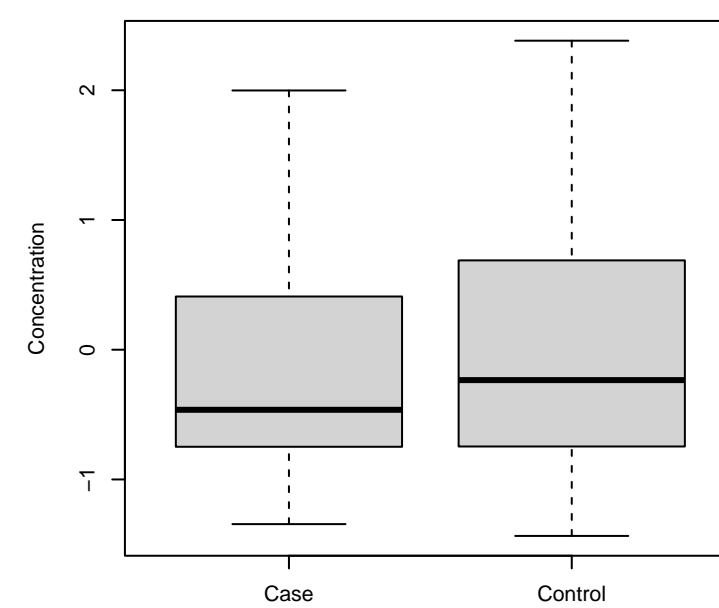

Supplement: Supplementary file [file media-1.pdf]
